# Supplementary material for: Change in force profile of the hardstyle kettlebell swing in older adults is small following 16 weeks of training and may not be required to improve physical function: findings from the BELL trial
Source: bioRxiv or medRxiv preprint supplement (doi:10.1101/2021.08.27.21262528), 2021-09-02
Supplement: Supplementary file [file media-1.pdf]

**Supplementary data:** Change in force-time curve profiles before and after training intervention

Before intervention

After intervention

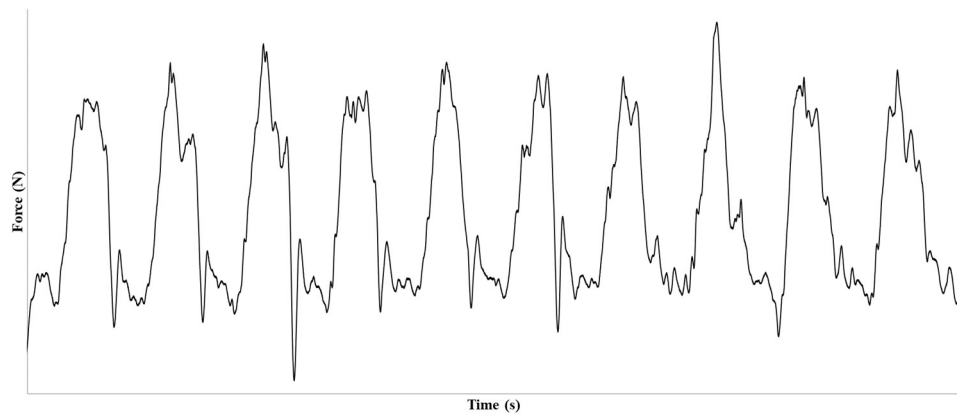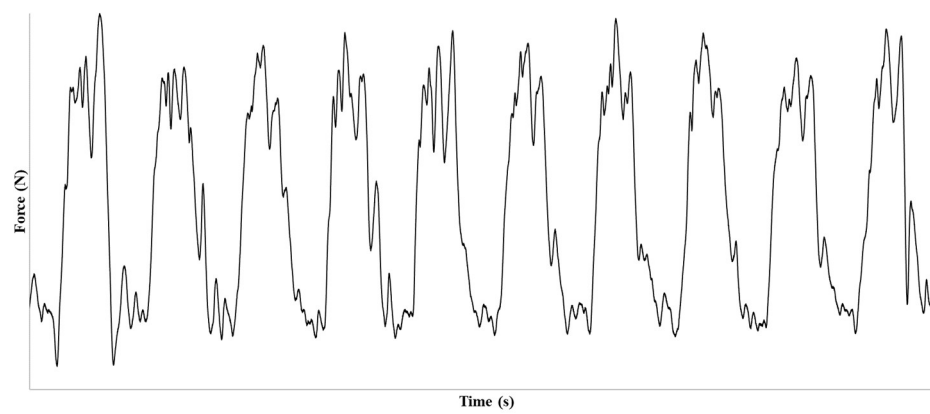

Participant 1

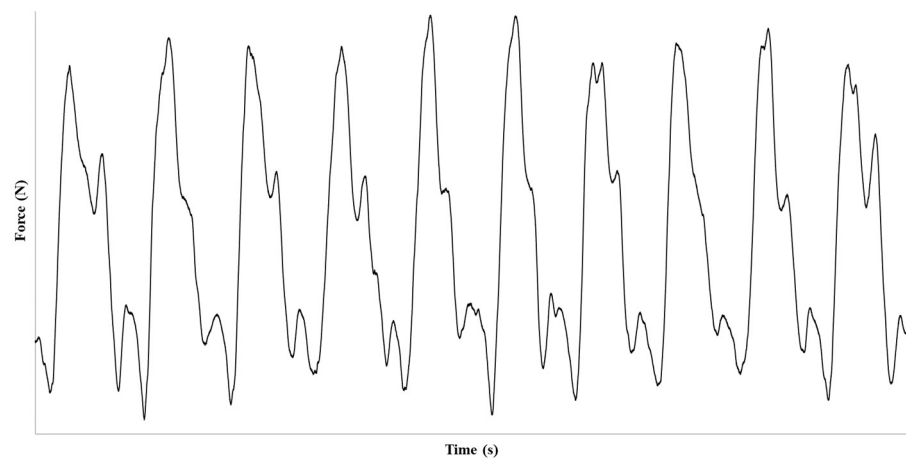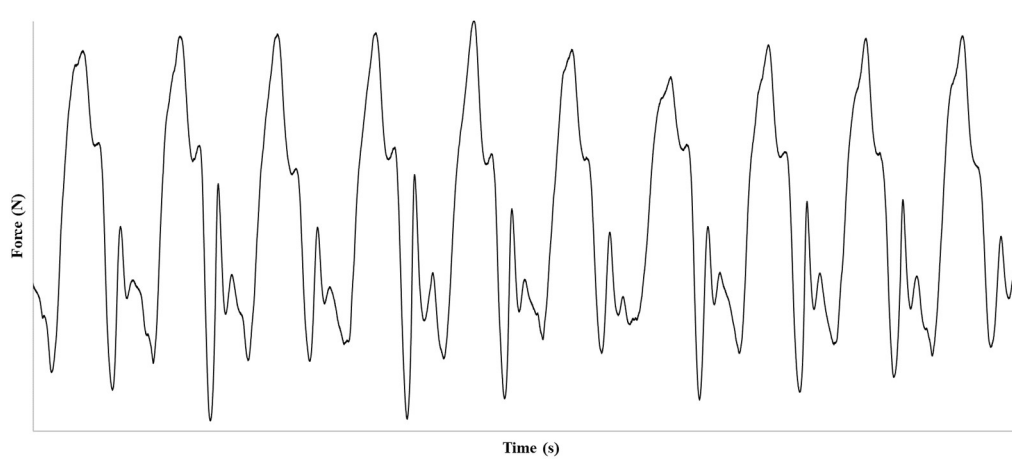

Participant 2

Before intervention

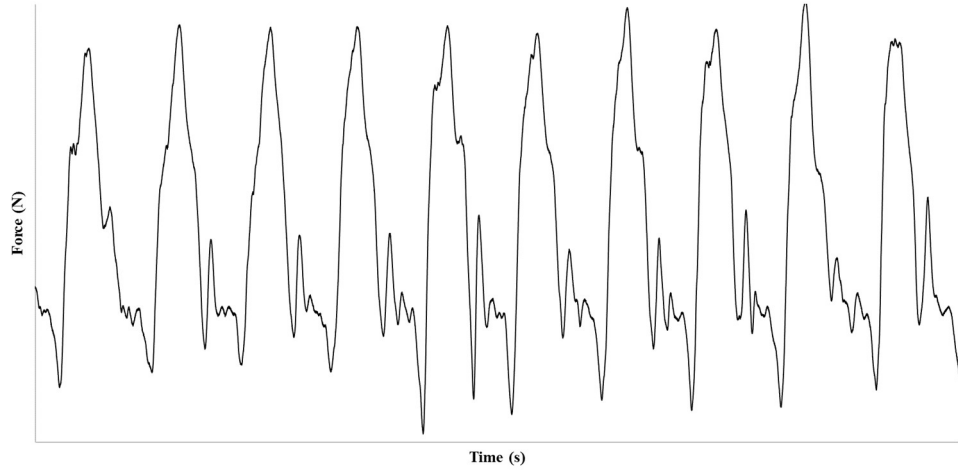

After intervention

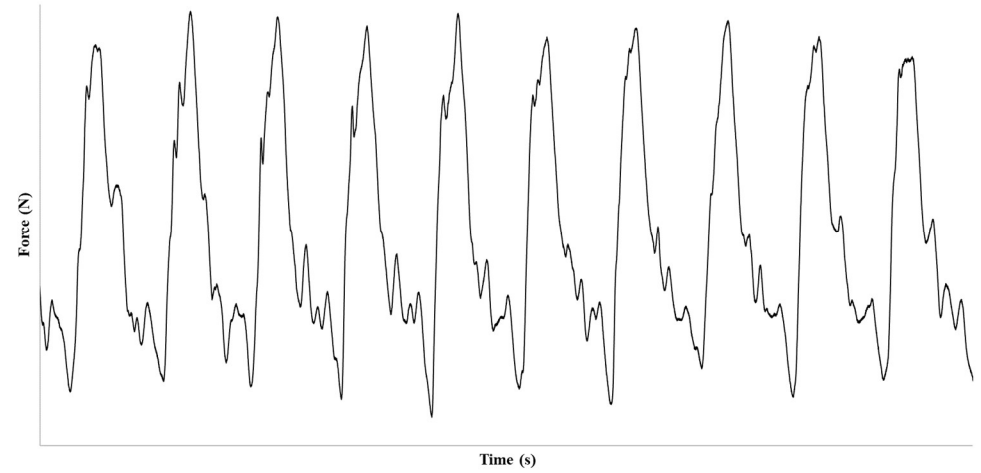

Participant 3

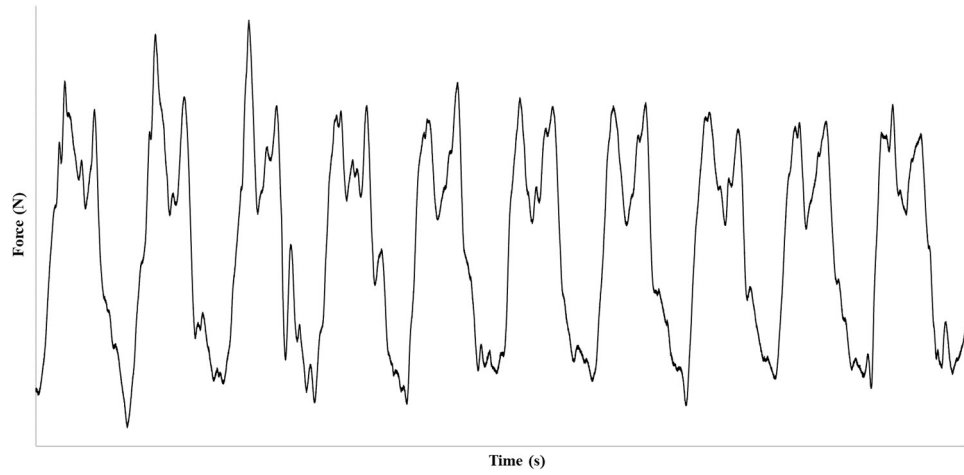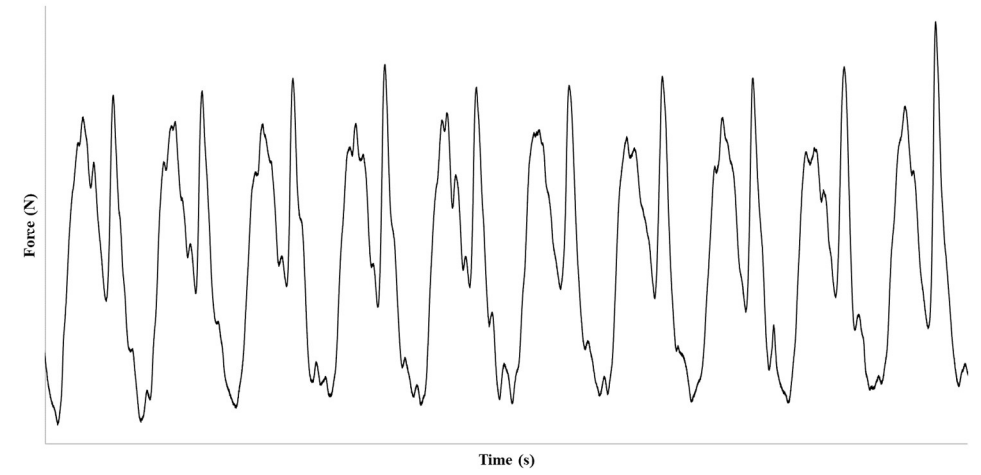

Participant 4

Before intervention

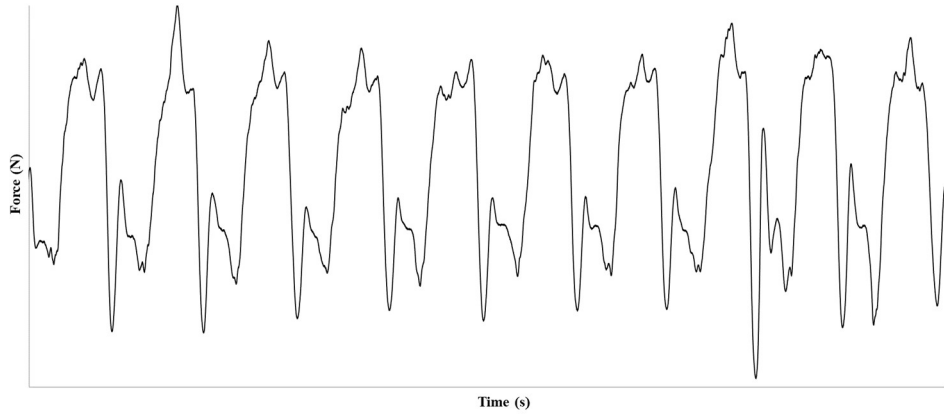

After intervention

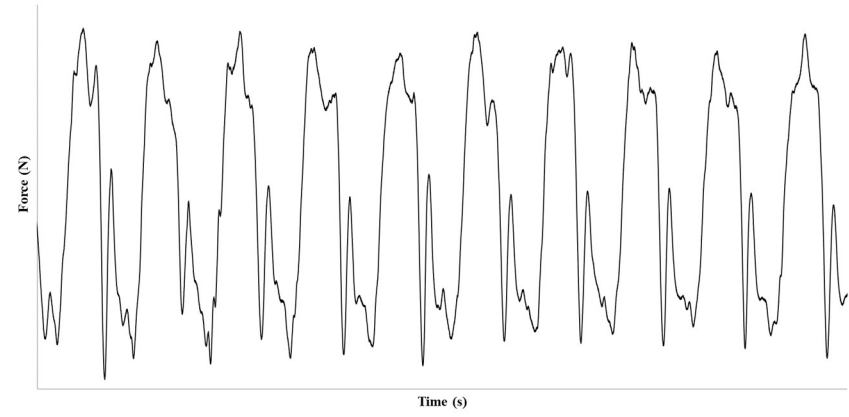

Participant 5

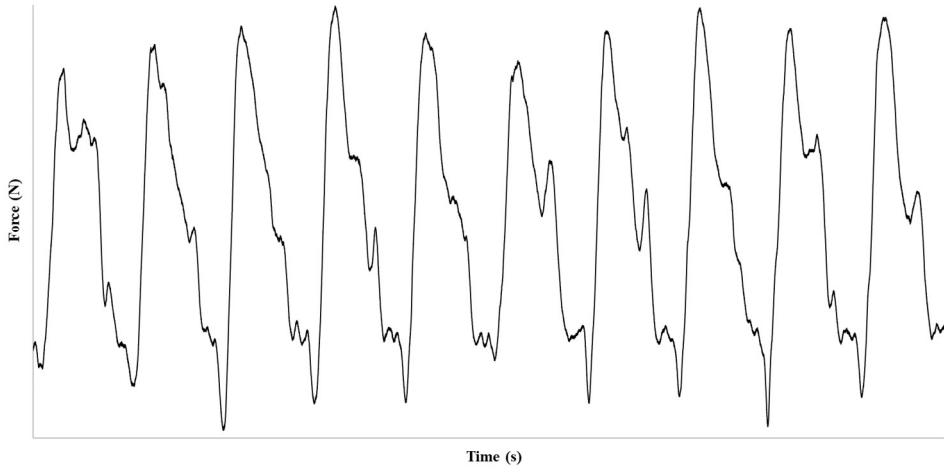

Participant 6

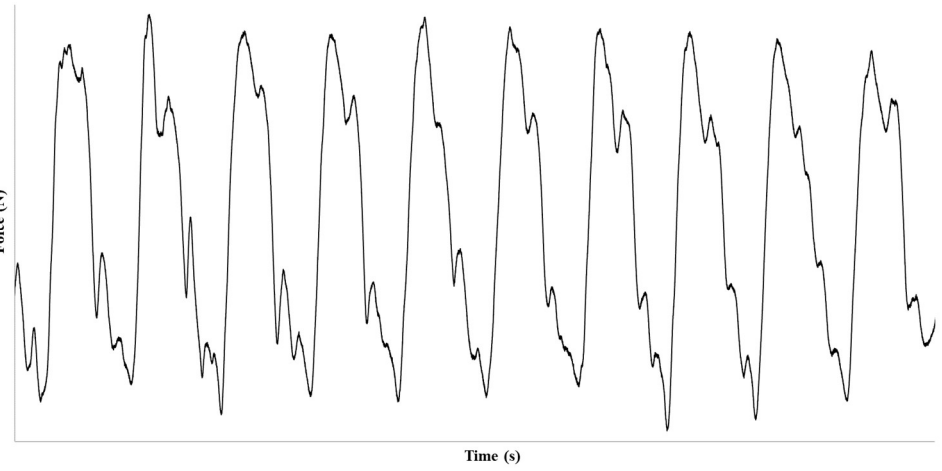

Before intervention

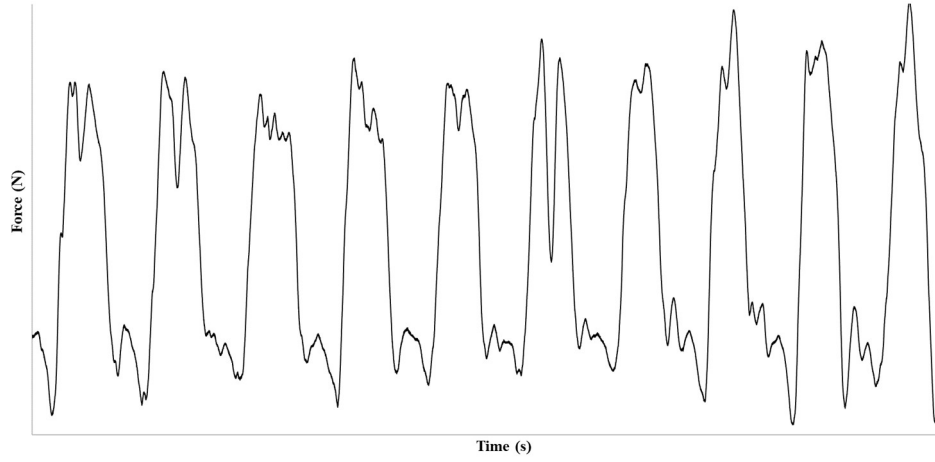

After intervention

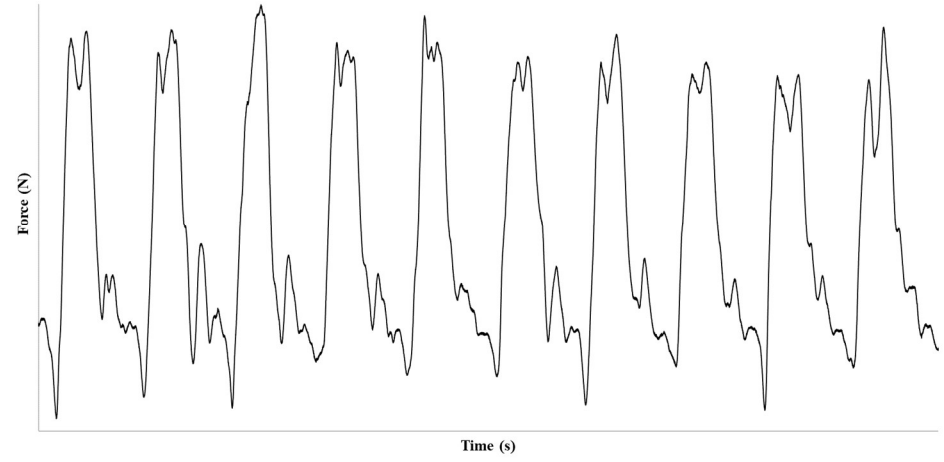

Participant 7

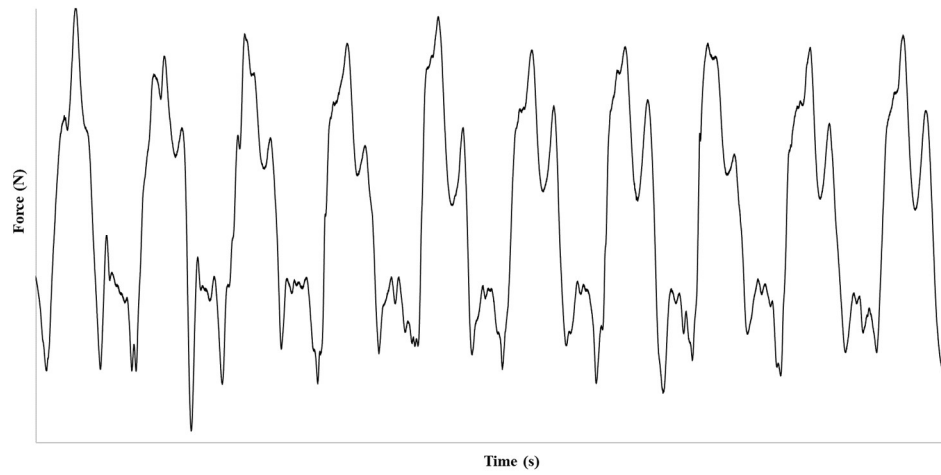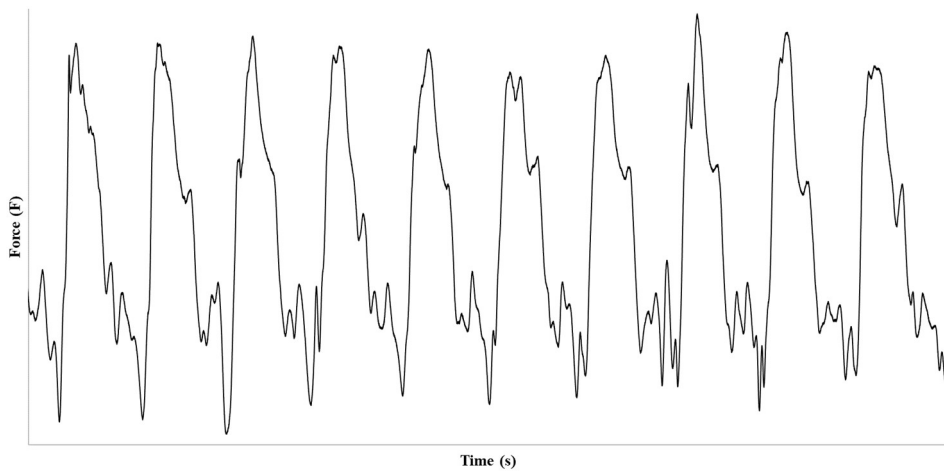

Participant 8

Before intervention

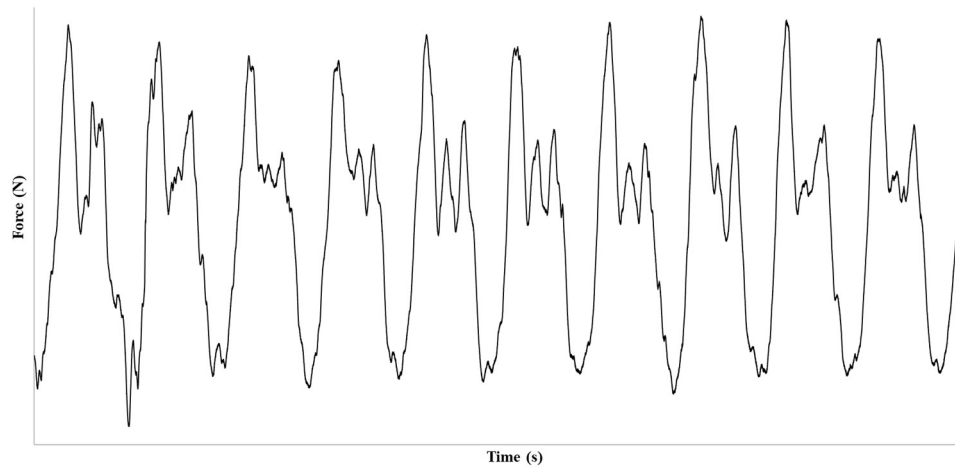

After intervention

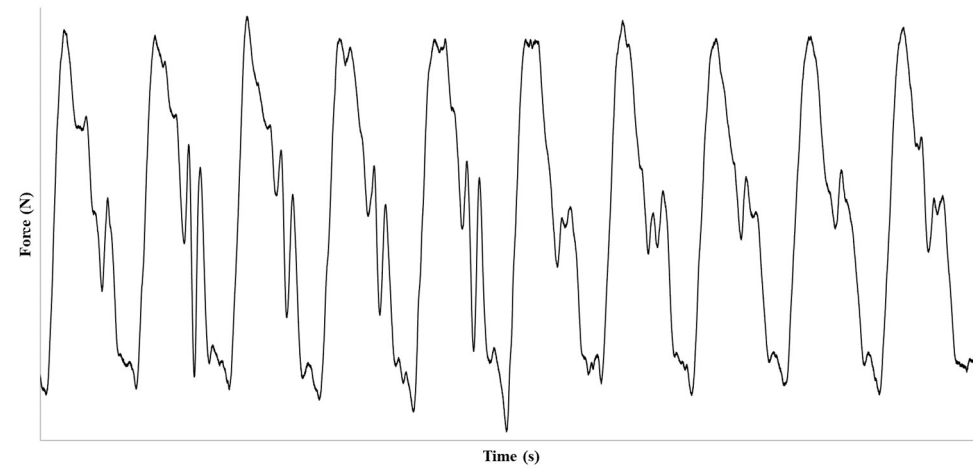

Participant 9

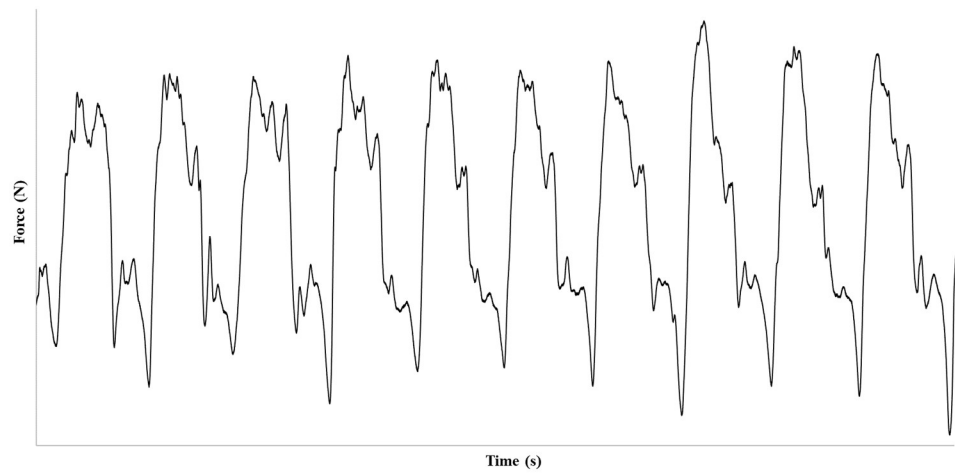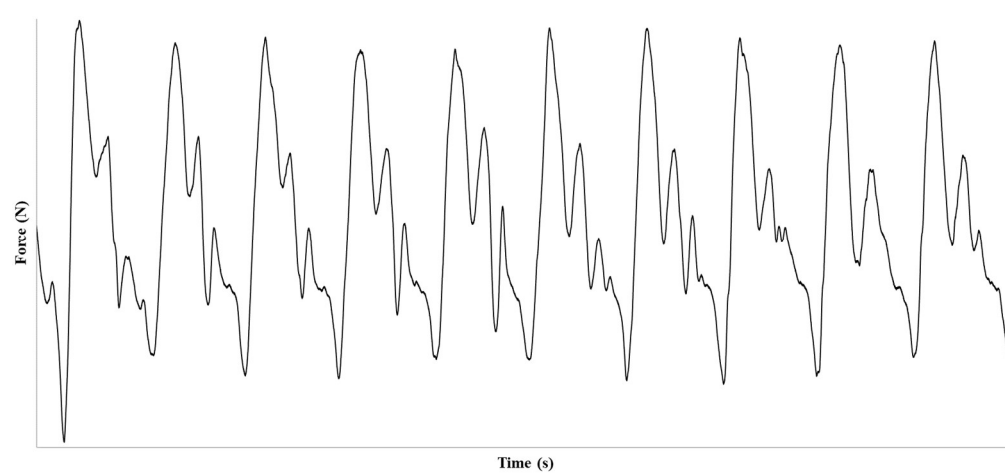

Participant 10
